# Determinants of self-reported symptoms and testing for COVID in Canada using a nationally representative survey

Daphne C Wu MSc (1), Prabhat Jha DPhil (1), Teresa Lam BA (2), Patrick Brown PhD (1, 3), Hellen Gelband MHS (1), Nico Nagelkerke PhD (1), H. Chaim Birnboim MD (1, 4), Angus Reid PhD (2) on behalf of the Action to Beat Coronavirus in Canada/Action pour Battre le Coronavirus (**Ab-C**) Study Group

1. Centre for Global Health Research, St. Michael's Hospital, Unity Health Toronto, and Dalla Lana School of Public Health, University of Toronto

2. Angus Reid Institute

3. Department of Statistical Sciences, University of Toronto

4. deltaDNA Biosciences, Inc., Toronto

[Prabhat.jha@utoronto.ca](mailto:Prabhat.jha@utoronto.ca)

Abstract: 149 words

Text: 2160 words, 12 references, 3 tables

## Abstract

In April 2020, the first-ever nationally representative survey in Canada polled 4,240 adults age 18 years and older about their COVID experience in March, early in the epidemic. We examined determinants of COVID symptoms, defined as fever plus difficulty breathing/shortness of breath, dry cough so severe that it disrupts sleep, and/or loss of sense of smell; and testing for SARS-CoV-2 by respondents and/or household members. About 8% of Canadians reported that they and/or one or more household members experienced COVID symptoms. Symptoms were more common in younger than older adults, and among visible minorities. Overall, only 3% of respondents and/or household members reported testing for SARS-CoV-2. Being tested was associated with having COVID symptoms, Indigenous identity, and living in Quebec. Periodic nationally representative surveys—including high-risk older populations—of symptoms, as well as SARS-CoV-2 antibodies, are required in many countries to understand the pandemic and prepare for the future.

31 **Introduction**

32 The pandemic of SARS-CoV-2 infection causing coronavirus disease-2019 (COVID-19, hereafter  
33 “COVID”) has affected Canada and many other high-income countries (Eggertson and Wolfville,  
34 2020). In these settings where reliable data can be gathered, a combination of population-  
35 based surveys (including surveys and testing), hospitalizations, and mortality data can produce  
36 an accurate profile of the impact of the epidemic.

37 We report on the results of the first nationally-representative poll of self-reported COVID  
38 symptoms conducted in Canada by the Angus Reid Forum in early April 2020 covering  
39 symptoms reported mostly in March 2020, prior to the peak month of cases in April. Our goal  
40 was to understand the distribution and determinants of Canadians reporting possible COVID  
41 symptoms. We also sought to understand who underwent testing for SARS-CoV-2 using the  
42 current standard (PCR-based) test. We discuss these findings in the context of the age  
43 distribution of COVID hospitalizations and deaths, and a planned survey of antibodies to SARS-  
44 CoV-2 in a random sample of Canadians.

45 **Results**

46 To determine the representativeness of the respondents, we compared their socio-  
47 demographic characteristics to those of the Canadian population in 2019 (Table 1). Overall, the  
48 survey respondents were broadly representative of Canadian society in terms of gender, age,  
49 regional distribution, and numbers of household members. Survey respondents were less  
50 representative of Canada in terms of ethnicities other than Indigenous. The survey had fewer  
51 single-member households than in the Canadian census, and had slightly higher education  
52 levels than did the 2019 Canadian population. Approximately 0.3 million (out a total population  
53 of 38 million) Canadians are estimated to live in nursing homes/long-term care institutions  
54 (Canadian Life and Health Insurance Association, 2014). This would represent less than 1% of  
55 the expected population in the survey (or about 40 participants). However, such populations  
56 were under-represented in the survey.

**Table 1. Socio-demographic characteristics of respondents (N=4,240) as compared to the Canadian population in 2019.**

| Characteristics                    | Completed survey,<br>sample size |      | Canadian<br>population,<br>2019 (%)<br>(Statistics<br>Canada, 2016;<br>Statistics<br>Canada, 2020a) |
|------------------------------------|----------------------------------|------|-----------------------------------------------------------------------------------------------------|
|                                    | n                                | %    |                                                                                                     |
| <b>Gender</b>                      |                                  |      |                                                                                                     |
| Male                               | 2017                             | 47.9 | 49.4                                                                                                |
| Female                             | 2205                             | 52.0 | 50.6                                                                                                |
| Other                              | 18                               | 0.4  |                                                                                                     |
| <b>Age group</b>                   |                                  |      |                                                                                                     |
| 18-45 years                        | 2007                             | 47.3 | 46.4                                                                                                |
| 46-65 years                        | 1511                             | 35.6 | 33.4                                                                                                |
| 66+ years                          | 722                              | 17.0 | 20.2                                                                                                |
| <b>Education</b>                   |                                  |      |                                                                                                     |
| High school and under              | 1064                             | 25.1 | 35.2                                                                                                |
| Some college/university and higher | 3176                             | 74.9 | 64.8                                                                                                |
| <b>Visible minority</b>            |                                  |      |                                                                                                     |
| No                                 | 3686                             | 86.9 | 71.4                                                                                                |
| Yes                                | 554                              | 13.1 | 28.7                                                                                                |
| <b>Number of household members</b> |                                  |      |                                                                                                     |
| Lived alone                        | 672                              | 15.9 | 28.2                                                                                                |
| Two people                         | 1615                             | 38.1 | 34.4                                                                                                |
| Three people                       | 804                              | 19.0 | 15.2                                                                                                |
| Four or more people                | 1149                             | 27.1 | 22.2                                                                                                |
| <b>Ethnicity</b>                   |                                  |      |                                                                                                     |
| Indigenous <sup>†</sup>            | 226                              | 5.3  | 5.0                                                                                                 |
| English and other European         | 3567                             | 84.1 | 73.1                                                                                                |
| Others                             | 365                              | 8.6  | 22.0                                                                                                |
| Rather Not Say                     | 82                               | 1.9  |                                                                                                     |
| <b>Province/region</b>             |                                  |      |                                                                                                     |
| Ontario                            | 1600                             | 37.7 | 38.9                                                                                                |
| British Columbia                   | 554                              | 13.1 | 13.8                                                                                                |
| Quebec                             | 1020                             | 24.1 | 22.7                                                                                                |
| Alberta                            | 475                              | 11.2 | 11.2                                                                                                |
| Manitoba                           | 150                              | 3.5  | 3.5                                                                                                 |
| Saskatchewan                       | 133                              | 3.1  | 3.0                                                                                                 |
| Atlantic provinces                 | 308                              | 7.3  | 6.6                                                                                                 |

\*All comparisons are from the 2016 Census, except Province/region which is from 2019 Statistics Canada population data (Statistics Canada, 2020a).

<sup>†</sup>Indigenous populations including First Nations, Inuit, or Métis.

57 Of the 4,240 respondents, 334 (7.9% after applying survey weights) reported COVID symptoms,  
58 defined as the respondent reporting himself/herself and/or at least one of the household  
59 members experiencing a combination of fever (with or without hallucinations) and any of i)  
60 difficulty breathing/shortness of breath or ii) dry cough so severe that it disrupts sleep or iii) a  
61 loss of a sense of smell. Of these, 210 (5.0%) reported COVID symptoms only in themselves. The  
62 adjusted odds ratio (OR) of the respondent having symptoms when at least one of the  
63 household members reported symptoms was 1.45 (95% CI 1.41-1.49); the OR was similar for at  
64 least one household member having symptoms if the respondent reported symptoms. In terms  
65 of testing for SARS-CoV-2, 126 (or 3.0%) reported some household testing or being scheduled  
66 for testing, and only 68 (or 1.6%) reported that they have been or are scheduled for testing.  
67 Details of the variation in COVID symptoms and SARS-CoV-2 testing in this sample across  
68 provinces have already been published (Angus Reid Institute, 2020).

69 Table 2 shows the OR of respondents or a member of the household, and respondents only  
70 having COVID symptoms after adjustment for other variables examined. We excluded 99 (or  
71 2.3%) respondents who did not report on at least one of the variables. The proportion of  
72 respondents reporting COVID symptoms within the household decreased with age: 11.2% of  
73 those aged 18-45 years, 5.6% among those aged 46-65 years, and 3.1% among those aged 66  
74 years and older. The lower prevalence at higher ages was similar among those reporting COVID  
75 symptoms only themselves. After controlling for gender, province, age, ethnicity, visible  
76 minority, and number of household members, older adults were significantly less likely to  
77 report having COVID symptoms themselves or within the household (age 46-65, OR=0.55, 0.42-  
78 0.71; age 66+, OR=0.30, 0.18-0.47). Those who reported themselves as a visible minority were  
79 significantly more likely to have COVID symptoms (12.9%) compared to those who did not  
80 (7.1%; adjusted OR=1.55; 1.08-2.20). Similar results were found when we examined COVID  
81 symptoms only among respondents. The associations changed substantially between  
82 unadjusted and adjusted analyses, most notably for ethnicity, and somewhat for being a visible  
83 minority, suggesting that some residual confounding factors were present. Results using a  
84 narrower definition of COVID symptoms, namely having fever, difficulty breathing/shortness of  
85 breath, and severe dry cough were similar (data not shown).

86 Table 3 shows the adjusted odds ratios of respondents or a member of the household being  
87 tested or scheduled for SARS-CoV-2 testing. The strongest determinant of testing was having  
88 COVID symptoms among members of the household, of whom about 16.5% were tested,  
89 compared to 2.1% among those without COVID symptoms among household members  
90 (OR=6.63, 4.46-9.79). Testing rates fell with age, but not significantly so. Testing rates were  
91 2.7% in English and other European ethnicity, and higher in indigenous people (7.2%; OR=2.07;  
92 1.13-3.64). However, the ORs fell notably (from 2.94 to 2.07) after adjustment for co-variates,  
93 suggesting residual confounding (data not shown). Testing rates in Quebec were roughly double

94 those in Ontario, the reference province (OR=2.41; 1.49-3.96). Findings were similar among  
95 those who reported having been tested or being scheduled to be tested (data not shown).

**Table 2. Logistic regression models for respondents or a member of household, and respondents only having COVID symptoms.**

| Characteristics                    | Respondents or a member of household having symptoms |      |                               | Respondents only having symptoms |     |                               |
|------------------------------------|------------------------------------------------------|------|-------------------------------|----------------------------------|-----|-------------------------------|
|                                    | COVID symptoms positive/negative                     |      | Adjusted odds ratios (95% CI) | COVID symptoms positive/negative |     | Adjusted odds ratios (95% CI) |
|                                    | N=324/3817                                           | %    |                               | N=202/393                        | %   |                               |
| <b>Gender</b>                      |                                                      |      |                               |                                  |     |                               |
| Male                               | 149/1840                                             | 7.5  | Ref                           | 85/1904                          | 4.3 | Ref                           |
| Female                             | 175/1977                                             | 8.1  | 1.11 (0.89-1.40)              | 117/2036                         | 5.4 | 1.30 (0.97-1.74)              |
| <b>Age group</b>                   |                                                      |      |                               |                                  |     |                               |
| 18-45 years                        | 218/1724                                             | 11.2 | Ref                           | 126/1816                         | 6.5 | Ref                           |
| 46-65 years                        | 84/1403                                              | 5.6  | <b>0.55 (0.42-0.71)</b>       | 61/1426                          | 4.1 | <b>0.61 (0.44-0.84)</b>       |
| 66+ years                          | 22/690                                               | 3.1  | <b>0.30 (0.18-0.47)</b>       | 15/697                           | 2.1 | <b>0.29 (0.16-0.50)</b>       |
| <b>Education</b>                   |                                                      |      |                               |                                  |     |                               |
| Some college/university and higher | 237/2874                                             | 8.4  | Ref                           | 150/2961                         | 4.8 | Ref                           |
| High school and under              | 87/943                                               | 7.6  | 1.25 (0.96-1.62)              | 52/978                           | 5.1 | 1.16 (0.83-1.61)              |
| <b>Visible minority</b>            |                                                      |      |                               |                                  |     |                               |
| No                                 | 256/3359                                             | 7.1  | Ref                           | 155/3460                         | 4.3 | Ref                           |
| Yes                                | 68/458                                               | 12.9 | <b>1.55 (1.08-2.20)</b>       | 47/479                           | 8.9 | <b>2.08 (1.34-3.15)</b>       |
| <b>Number of household members</b> |                                                      |      |                               |                                  |     |                               |
| Two people                         | 108/1479                                             | 6.8  | Ref                           | 79/1507                          | 5.0 | Ref                           |
| Lived alone                        | 29/626                                               | 4.4  | 0.69 (0.45-1.02)              | 29/626                           | 4.5 | 1.01 (0.64-1.53)              |
| Three people                       | 77/704                                               | 9.9  | 1.17 (0.85-1.61)              | 45/736                           | 5.8 | 0.86 (0.57-1.28)              |
| Four or more people                | 110/1008                                             | 9.8  | 1.19 (0.89-1.59)              | 48/1070                          | 4.3 | 0.72 (0.49-1.05)              |
| <b>Ethnicity</b>                   |                                                      |      |                               |                                  |     |                               |
| English and other European         | 252/3305                                             | 7.1  | Ref                           | 158/3399                         | 4.4 | Ref                           |
| Indigenous*                        | 27/195                                               | 12.2 | 1.31 (0.83-2.01)              | 19/203                           | 8.5 | 1.34 (0.76-2.24)              |
| Others                             | 45/317                                               | 12.4 | 1.20 (0.79-1.80)              | 25/337                           | 7.0 | 0.87 (0.50-1.47)              |
| <b>Province/region</b>             |                                                      |      |                               |                                  |     |                               |
| Ontario                            | 129/1448                                             | 8.2  | Ref                           | 83/1493                          | 5.3 | Ref                           |
| British Columbia                   | 44/495                                               | 8.2  | 1.08 (0.77-1.51)              | 23/516                           | 4.2 | 0.80 (0.51-1.24)              |
| Quebec                             | 65/922                                               | 6.6  | 0.93 (0.66-1.29)              | 42/945                           | 4.2 | 0.85 (0.56-1.27)              |
| Prairie provinces                  | 63/674                                               | 8.5  | 1.09 (0.79-1.49)              | 39/697                           | 5.2 | 0.98 (0.66-1.45)              |
| Atlantic provinces                 | 23/278                                               | 7.6  | 1.11 (0.68-1.76)              | 15/287                           | 5.0 | 0.99 (0.53-1.74)              |

\*Indigenous populations including First Nations, Inuit, or Métis.

Bolded values indicate significance at 95% confidence interval. Adjustment was for the other variables in the table. The number reporting COVID symptoms was 341 in unweighted analyses and 334 after survey weights were applied, showing the sampling frame as robust.

**Table 3. Logistic regression models for respondent or a member of household having been tested for SARS-CoV-2.**

| Characteristics                                              | Respondents or a member of household having been tested |                               |                         | Respondents only having been tested |                               |                          |
|--------------------------------------------------------------|---------------------------------------------------------|-------------------------------|-------------------------|-------------------------------------|-------------------------------|--------------------------|
|                                                              | SARS-CoV-2 tested/not tested                            | Adjusted odds ratios (95% CI) |                         | SARS-CoV-2 tested/not tested        | Adjusted odds ratios (95% CI) |                          |
|                                                              | N=126/4015 %                                            |                               |                         | N=66/4075 %                         |                               |                          |
| <b>Respondent and/or household member had COVID symptoms</b> |                                                         |                               |                         |                                     |                               |                          |
| No                                                           | 80/3737                                                 | 2.1                           | Ref                     | 42/3775                             | 1.1                           | Ref                      |
| Yes                                                          | 46/278                                                  | 16.5                          | <b>6.63 (4.46-9.79)</b> | 24/300                              | 7.5                           | <b>6.63 (3.82-11.32)</b> |
| <b>Gender</b>                                                |                                                         |                               |                         |                                     |                               |                          |
| Male                                                         | 68/1921                                                 | 3.5                           | Ref                     | 34/1955                             | 1.7                           | Ref                      |
| Female                                                       | 58/2094                                                 | 2.7                           | 0.72 (0.51-1.03)        | 32/2120                             | 1.5                           | 0.85 (0.52-1.38)         |
| <b>Age group</b>                                             |                                                         |                               |                         |                                     |                               |                          |
| 18-45 years                                                  | 84/1858                                                 | 4.5                           | Ref                     | 41/1900                             | 2.1                           | Ref                      |
| 46-65 years                                                  | 32/1455                                                 | 2.2                           | 0.69 (0.45-1.05)        | 19/1468                             | 1.3                           | 0.75 (0.42-1.31)         |
| 66+ years                                                    | 10/702                                                  | 0.7                           | 0.54 (0.25-1.05)        | 5/707                               | 0.7                           | 0.44 (0.14-1.08)         |
| <b>Education</b>                                             |                                                         |                               |                         |                                     |                               |                          |
| Some college/university and higher                           | 96/3015                                                 | 3.1                           | Ref                     | 52/3059                             | 1.7                           | Ref                      |
| High school and under                                        | 29/1000                                                 | 2.8                           | 0.88 (0.56-1.35)        | 14/1016                             | 1.3                           | 0.74 (0.37-1.35)         |
| <b>Visible minority</b>                                      |                                                         |                               |                         |                                     |                               |                          |
| No                                                           | 96/3519                                                 | 2.7                           | Ref                     | 52/3563                             | 1.4                           | Ref                      |
| Yes                                                          | 30/496                                                  | 5.7                           | 0.83 (0.36-1.05)        | 14/512                              | 2.7                           | 0.54 (0.27-1.15)         |
| <b>Number of household members</b>                           |                                                         |                               |                         |                                     |                               |                          |
| Two people                                                   | 38/1548                                                 | 2.4                           | Ref                     | 19/1567                             | 1.2                           | Ref                      |
| Lived alone                                                  | 13/642                                                  | 2.0                           | 0.83 (0.43-1.52)        | 13/642                              | 2.0                           | 1.77 (0.86-3.57)         |
| Three people                                                 | 28/754                                                  | 3.6                           | 1.18 (0.69-1.97)        | 18/764                              | 2.3                           | 1.28 (0.62-2.56)         |
| Four or more people                                          | 47/1071                                                 | 4.2                           | 1.32 (0.84-2.09)        | 16/1102                             | 1.4                           | 0.93 (0.47-1.84)         |
| <b>Ethnicity</b>                                             |                                                         |                               |                         |                                     |                               |                          |
| English and other European                                   | 95/3462                                                 | 2.7                           | Ref                     | 54/3503                             | 1.5                           | Ref                      |
| Indigenous*                                                  | 16/206                                                  | 7.2                           | <b>2.07 (1.13-3.64)</b> | 9/213                               | 3.9                           | 2.04 (0.89-4.28)         |
| Others                                                       | 15/347                                                  | 4.1                           | 0.99 (0.49-1.89)        | 4/359                               | 1.0                           | 0.47 (0.13-1.32)         |
| <b>Province/region</b>                                       |                                                         |                               |                         |                                     |                               |                          |
| Ontario                                                      | 40/1537                                                 | 2.5                           | Ref                     | 22/1554                             | 1.4                           | Ref                      |
| British Columbia                                             | 15/524                                                  | 2.8                           | 1.08 (0.59-1.93)        | 7/532                               | 1.3                           | 0.81 (0.34-1.81)         |
| Quebec                                                       | 47/940                                                  | 4.8                           | <b>2.41 (1.49-3.96)</b> | 26/961                              | 2.6                           | <b>1.98 (1.05-3.81)</b>  |
| Prairie provinces                                            | 19/717                                                  | 2.6                           | 1.13 (0.65-1.95)        | 7/730                               | 1.0                           | 0.74 (0.32-1.63)         |
| Atlantic provinces                                           | 5/297                                                   | 1.7                           | 0.92 (0.34-2.14)        | 4/299                               | 1.2                           | 1.03 (0.29-2.87)         |

\*Indigenous populations including First Nations, Inuit, or Métis.

Bolded values indicate significance at 95% confidence interval. Adjustment was for the other variables in the table.

96 **Discussion**

97 A nationally representative survey of Canadians finds that about 8% of adults report that they  
98 or someone in their household reported symptoms suggestive of COVID in March 2020. Being a  
99 visible minority was associated with higher self-reported COVID symptoms. Self-reported  
100 symptoms were notably less common at older ages than in younger adults. Only 3% of  
101 Canadian adults reported that they or someone in the household had been tested for SARS-  
102 CoV-2. The main determinants of being tested were the presence of COVID symptoms, being of  
103 Indigenous identity, and living in Quebec. Testing rates were somewhat lower in older adults.  
104 There are surprisingly few nationally representative studies, and despite some limitations, this  
105 study represents the first to document self-reported symptoms in a reasonably representative  
106 sample.

107 COVID symptoms overlap with some other infections, notably seasonal influenza, which could  
108 have inflated the coronavirus rates in this survey. However, a study comparing the COVID  
109 symptom syndrome with other infections in the United States suggests that most are actually  
110 due to COVID (Centers for Disease Control and Prevention, 2020). We found possible COVID  
111 symptoms to be less prevalent and the levels of testing marginally less prevalent in older adults  
112 than other age groups, despite the certainty that the vast majority of COVID hospitalizations  
113 and deaths occur at older ages. However, a weakness of our sample is the lack of  
114 representation from nursing and long-term care residents, in whom more than three-quarters  
115 of all COVID deaths occur (Eggertson and Wolfville, 2020). There may be additional reasons for  
116 the age-specific findings, however. Anecdotal reports suggest that older adults do not  
117 experience the symptoms used to define COVID infection in the poll, but may report vaguer  
118 symptoms such as dizziness and confusion (Graham, 2020). Further surveys focused on  
119 syndromes that might occur in older adults are warranted. The testing results are broadly  
120 consistent with reports of the general levels of access to SARS-CoV-2 testing during the survey  
121 time period, including a higher level of testing in Quebec than in Ontario (Angus Reid Institute,  
122 2020).

123 This syndromic survey provides some insights into the prevalence of actual SARS-CoV-2 in  
124 Canada. The survey period was mostly in March, whereas models and case reports suggest that  
125 peak exposure and incidence of COVID occurred in mid- to late April (Eggertson and Wolfville,  
126 2020). Hence, we would expect that a repeated syndromic survey should report a higher  
127 prevalence in April. On the other hand, Forum Research and Mainstreet Research reported an  
128 estimated prevalence of 5-8% in early-to-mid April in Ontario. However, they used a narrow  
129 range of symptoms from those we defined in our study (Forum Research and Mainstreet  
130 Research, 2020).



131 In the UK, pilot results from the COVID-19 Infection Survey being carried out by the Office for  
132 National Statistics found that 0.25% of the community population in England above the age of  
133 2, tested positive for the SARS-CoV-2 antigen in early-to-mid May 2020. Testing involved home  
134 self-tests of nasal swabs, and excluded those in hospitals, care homes, or other institutional  
135 settings (Office for National Statistics, 2020). The prevalence was lower than expected in the  
136 pilot, and larger studies are planned, along with antibody surveys. A nationally representative  
137 sero-epidemiological study is needed to establish the population distribution of cumulative  
138 SARS-CoV-2 infection, which would capture both symptomatic and asymptomatic cases. We will  
139 soon conduct such a study in Canada called Action to Beat Coronavirus/Action pour Battre le  
140 Coronavirus (Ab-C). This study will determine the cumulative prevalence of SARS-CoV-2  
141 infection during March-May 2020 in Canada through antibody testing, paired with household  
142 questionnaire data on COVID experience. A second round of questionnaires and antibody  
143 testing four to six months later in the same individuals will provide information on ongoing  
144 transmission, changes in the immune status of the population, and the durability of the  
145 immune response. The Angus Reid Forum is partnering with the Centre for Global Health  
146 Research at Unity Health Toronto and the University of Toronto on this study. The expected  
147 sample frame is 12-18,000 individuals surveyed, of which we expect 10-12,000 to agree to  
148 answer questions and provide a blood sample.

149 The present analysis informs the design of antibody surveys. For example, since the strongest  
150 determinant of COVID testing was the presence of symptoms, a similar higher prevalence of  
151 antibodies might be expected among those reporting symptoms (who may be more likely to  
152 enroll in the survey). Thus, ensuring that the sample size is sufficiently large to examine the  
153 seroprevalence in those without symptoms is key. Similarly, while the current study did not  
154 examine geographic clustering of COVID symptoms, this might well be the case with actual  
155 SARS-CoV-2 infection. This also necessitates a large and as diversely representative survey as  
156 possible. Older adults bear the brunt of COVID hospitalization and deaths. However, this  
157 population reported a lower prevalence of symptoms than younger adults. Thus, the Ab-C study  
158 will oversample the population age 60 or older, particularly to understand the possible role of  
159 asymptomatic infections at older ages. As the Ab-C study is not likely to capture the prevalence  
160 of infection among nursing home residents, ancillary studies are needed to quantify hazards  
161 among this important group.

## 162 *Limitations*

163 Self-reported symptoms are, by their nature, subject to limitations and misclassification.  
164 However, the trends over time, even with misclassification, are useful for understanding trends  
165 in the actual underlying prevalence of infection. This is because the “noise” of COVID symptoms  
166 should change little from one survey to the next, and provided there is large “signal” due to the

167 COVID pandemic—certainly the case with this virus—reliable estimation of the trends of  
168 infection are possible. Similar methodological insights have arisen from HIV-1 testing in  
169 pregnant populations in various countries (Kumar et al., 2006). The biases in enrollment are  
170 also inherent in any polling, but the Angus Reid polling showed reasonably good consistency  
171 with the Canadian 2016 census. Moreover, the testing results did not appear to be biased  
172 greatly, and the more common testing reported in Quebec is consistent with public health  
173 reports.

174 In conclusion, COVID surveillance using nationally representative surveys is essential, and  
175 ideally needs to be accompanied by antibody determination of infection. Particular attention  
176 must be paid to symptoms and testing levels in older adults.

## 177 **Materials and Methods**

178 The Angus Reid Institute (ARI) conducted an online survey from April 1-5, 2020, among a  
179 representative randomized sample of 4,240 Canadian adults who are members of Angus Reid  
180 Forum, a national online sample of 50,000 Canadians used for political and other social polling  
181 (Angus Reid Institute, 2020). A probability sample of this size carries a margin of error of +/- 2  
182 percentage points, 19 times out of 20. The survey was commissioned and paid for by ARI.  
183 Questions were related to COVID and socio-demographic characteristics among both the  
184 respondents and members of their households ([http://angusreid.org/covid-epidemiology-  
185 study/](http://angusreid.org/covid-epidemiology-study/)).

186 The outcomes were self-reported symptoms suggestive of COVID infection and testing for the  
187 virus. To understand the socio-demographic determinants of COVID symptoms, we conducted a  
188 logistic regression analysis, comparing COVID symptoms to the explanatory variables of gender,  
189 education level, province, age, ethnicity, visible minority (defined as persons, other than  
190 Aboriginal peoples, who are non-Caucasian in race or non-white in colour) (Statistics Canada,  
191 2020b), and number of household members. We defined Indigenous as whether the person  
192 reported identifying with the Aboriginal peoples of Canada which includes First Nations, Métis  
193 or Inuit and/or those who reported Registered or Treaty Indian status (Statistics Canada, 2019).  
194 We also used logistic regression analysis to identify determinants of testing, which included the  
195 above explanatory variables and also COVID symptoms in the respondent or a family member.  
196 Respondents who did not report on any of the explanatory variables were excluded from these  
197 analyses. Discrepancies in or between totals are due to rounding. We applied to prevalences  
198 the survey weights, which are described earlier (Angus Reid Institute, 2020). We used RStudio  
199 Version 1.1.453 for analyses.

## 200 *Ethics approval*

201 The Angus Reid Forum obtains consent from all participants, and the polling data without any  
202 individual identifiers are made available openly to bona-fide researchers. Ethics approval was  
203 not required as per Unity Health Toronto Research Ethics Board.

204

205 **Funding:** Canadian Institutes of Health Research, Angus Reid Institute

206 We declare no competing interests

207

208 **References**

- 209 Angus Reid Institute. 2020. The incidence of COVID-19 infection in Canada? New survey points to over 100,000  
210 households. <http://angusreid.org/covid-epidemiology-study/> [Accessed May 10, 2020]
- 211 Canadian Life and Health Insurance Association. 2014. *CLHIA report on long-term care policy: Improving the*  
212 *accessibility, quality and sustainability of long-term care in Canada.*  
213 [https://www.clhia.ca/web/clhia\\_lp4w\\_lnd\\_webstation.nsf/page/3C342451F891CF1D85257A240044F961/\\$file/L](https://www.clhia.ca/web/clhia_lp4w_lnd_webstation.nsf/page/3C342451F891CF1D85257A240044F961/$file/L)  
214 [TC Policy Paper 1 EN.pdf](https://www.clhia.ca/web/clhia_lp4w_lnd_webstation.nsf/page/3C342451F891CF1D85257A240044F961/$file/L) [Accessed May 19, 2020]
- 215 Centers for Disease Control and Prevention. 2020 May 8. COVIDView: A weekly surveillance summary of U.S. covid-  
216 19 activity. <https://www.cdc.gov/coronavirus/2019-ncov/covid-data/covidview/index.html> [Accessed May 13,  
217 2020]
- 218 Eggertson L, Wolfville NS. 2020. *COVID-19: Recent updates on the coronavirus pandemic.* CMAJ News, May 12,  
219 2020. <https://cmajnews.com/2020/05/12/coronavirus-1095847/> [Accessed May 13, 2020]
- 220 Forum Research, Mainstreet Research. 2020. *COVID-19 Study Ontario- Wave 2. April 22, 2020 – for immediate*  
221 *release.* <https://ipolitics.ca/wp-content/uploads/2020/04/Wave-2-Release-FINAL-2-April-22-2020.pdf> [Accessed  
222 May 12, 2020]
- 223 Graham, J. 2020 Apr 23. *Seniors with covid-19 show unusual symptoms, doctors say.* CNN.  
224 <https://www.cnn.com/2020/04/23/health/seniors-elderly-coronavirus-symptoms-wellness-partner/index.html>  
225 [Accessed May 13, 2020].
- 226 Kumar R, Jha P, Arora P, Mony P, Bhatia P, Millson P, Dhingra N, Bhattacharya M, Remis RS, Nagelkerke N,  
227 International studies of HIV/AIDS (ISHA) investigators. 2006. Trends in HIV-1 in young adults in south India from  
228 2000 to 2004: a prevalence study. *The Lancet* **367**:1164-1172.
- 229 Office for National Statistics. 2020. Coronavirus (COVID-19) infection survey pilot: England, 21 May 2020.  
230 [https://www.ons.gov.uk/peoplepopulationandcommunity/healthandsocialcare/conditionsanddiseases/bulletins/](https://www.ons.gov.uk/peoplepopulationandcommunity/healthandsocialcare/conditionsanddiseases/bulletins/coronaviruscovid19infectionsurveyspilot/england21may2020)  
231 [coronaviruscovid19infectionsurveyspilot/england21may2020](https://www.ons.gov.uk/peoplepopulationandcommunity/healthandsocialcare/conditionsanddiseases/bulletins/coronaviruscovid19infectionsurveyspilot/england21may2020) [Accessed May 26, 2020].
- 232 Statistics Canada. 2016. Census of population. [Accessed May 12, 2020].
- 233 Statistics Canada. 2019. Aboriginal identity of person.  
234 <https://www23.statcan.gc.ca/imdb/p3Var.pl?Function=DECI&Id=59224> [Accessed May 14, 2020]
- 235 Statistics Canada. 2020a. Table 17-10-0005-01 Population estimates on July 1st, by age and sex. [Accessed May  
236 12, 2020]
- 237 Statistics Canada. 2020b. Visible minority of person. Retrieved from  
238 <https://www23.statcan.gc.ca/imdb/p3Var.pl?Function=DEC&Id=45152> [Accessed May 14, 2020]
